# Supplementary material
Source: publisher figshare collection journal article supplement (https://wellcome.figshare.com/ndownloader/files/17591132)
Supplement: Supplementary file 1 [file 17591132]

# Overview of the Transformative Agreement

1. The [Publisher NAME] (“Publisher) has agreed with [CONSORTIUM NAME] (“Consortium”) this Overview of a Transformative Agreement for [INSERT Product Name/Title(s)] (“Product”).
2. The Publisher and the Consortium agree that they want this Transformative Agreement. to be part of a transition with the aim of shifting from subscriptions to full open access.
3. The Licence will provide consortium member institutions with access to and use of the Product. It will also provide Open Access Article publication in the Product for submitting corresponding authors affiliated to the institutions (“Eligible Authors”).
4. The Publisher and the Consortium share a mutual commitment to work on new approaches for the pricing for the renewal of the Licence. Future pricing approaches will be transparent, equitable around the world, and linked to impact of services on authors, readers, institutions, and society.

# As a result, the Publisher and the Consortium agree that they want to work together to evaluate the Licence.

1. The Licence will have a term of 3-years so that the Publisher and the Consortium have time to learn and evolve together.
2. To inform the Fee for the Transformative Agreement the Publisher and the Consortium have exchanged data about subscription spend, APC spend, and publishing patterns.
3. Data shared between the Publisher and the Consortium can form a starting position should the Transformative Licence not be renewed on the same terms.
4. Eligible Authors, on acceptance of publication, will have Open Access Articles published in the Product free of Article Processing Charges. The Publisher will not charge Eligible Authors or their institutions service fees (e.g. colour-in-print, reprints, posters).
5. The Publisher will identify approved Open Access Articles that Eligible Authors have submitted and will clearly indicate to them the availability the Transformative Journals Agreement. The Publisher will also communicate this to Eligible Authors both within its submitting process and on the its website. This will make clear that Eligible Authors do not need to pay Article Processing Charges for Open Access Articles under the terms of the Transformative Journals Agreement.
6. Eligible Authors retain copyright to their publications. All publications by Eligible Authors must be under an open license, preferably the Creative Commons Attribution license (CC BY) or the Creative Commons Attribution ShareAlike license (CC BY SA). Third-party content included in a publication, for example images or graphics, should be labelled clearly and are not affected by these requirements.
7. Institutions will have continuing post termination use and access rights to the titles in the Product.
8. The financial basis of the Transformative Agreement is [summarise commercial offer here].
9. The Fee for the Transformative Agreement will not increase for the term of the Licence, regardless of how many Open Access Articles by Eligible Authors are published in the Product. This means that there is no cap on the number of Open Access Articles Eligible Authors can publish in the Product during the term of the Transformative Journals Agreement.
10. A description of the Service Levels provided by the Publisher will be set out in Schedule X of the Licence. These will include but are not limited to the [template for Open Access Service Level Agreements](https://esac-initiative.org/wp-content/uploads/2019/02/ESAC-Open-Access-Service-Level-Agreement-Template.docx) at <https://esac-initiative.org/workflows/sample-workflow-terms-for-transformative-agreements/>
11. The Publisher will adhere to the mandatory cOAlition S requirements for:

- Basic mandatory conditions for all publication venues
- Mandatory technical conditions for all publication venues.

These requirements are set out at [https://www.coalition-s.org/principles-and-implementation /](https://www.coalition-s.org/principles-and-implementation%20/)

1. Details of the Transformative Journals Agreement, including all costs, pricing models and terms to be made publicly available online via (amongst others) the ESAC Registry <https://esac-initiative.org/>.
